# Supplementary material for: Rivastigmine–Benzimidazole Hybrids as Promising Multitarget Metal-Modulating Compounds for Potential Treatment of Neurodegenerative Diseases
Source: MDPI journal article supplement (doi:10.3390/ijms24098312), 2023-05-05
Supplement: s1 [file s1]

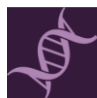

Supplementary Materials

# Rivastigmine–Benzimidazole Hybrids as Promising Multitarget Metal-Modulating Compounds for Potential Treatment of Neurodegenerative Diseases

David Vicente-Zurdo <sup>1,2</sup>, Leonardo Brunetti <sup>1,3</sup>, Luca Piemontese <sup>3</sup>, Beatriz Guedes <sup>4</sup>, Sandra M. Cardoso <sup>4,5</sup>, Daniel Chavarria <sup>6</sup>, Fernanda Borges <sup>6</sup>, Yolanda Madrid <sup>2</sup>, Sílvia Chaves <sup>1,\*</sup> and M. Amélia Santos <sup>1,\*</sup>

<sup>1</sup> Centro de Química Estrutural, Departamento de Engenharia Química, Institute of Molecular Sciences, Instituto Superior Técnico, Universidade de Lisboa, Av. Rovisco Pais 1, 1049-001 Lisboa, Portugal

<sup>2</sup> Department of Analytical Chemistry, Faculty of Chemistry, Complutense University of Madrid, Avenida Complutense s/n, 28040 Madrid, Spain

<sup>3</sup> Department of Pharmacy—Pharmaceutical Sciences, University of Bari Aldo Moro, via E. Orabona 4, 70125 Bari, Italy

<sup>4</sup> CNC—Center for Neuroscience and Cell Biology, University of Coimbra, 3000-370 Coimbra, Portugal

<sup>5</sup> FMUC—Faculty of Medicine, University of Coimbra, 3000-370 Coimbra, Portugal

<sup>6</sup> CIQUP-IMS, Department of Chemistry and Biochemistry, Faculty of Sciences, University of Porto, Rua do Campo Alegre s/n, 4169-007 Porto, Portugal

\* Correspondence: [silvia.chaves@tecnico.ulisboa.pt](mailto:silvia.chaves@tecnico.ulisboa.pt) (S.C.); [masantos@tecnico.ulisboa.pt](mailto:masantos@tecnico.ulisboa.pt) (M.A.S.)

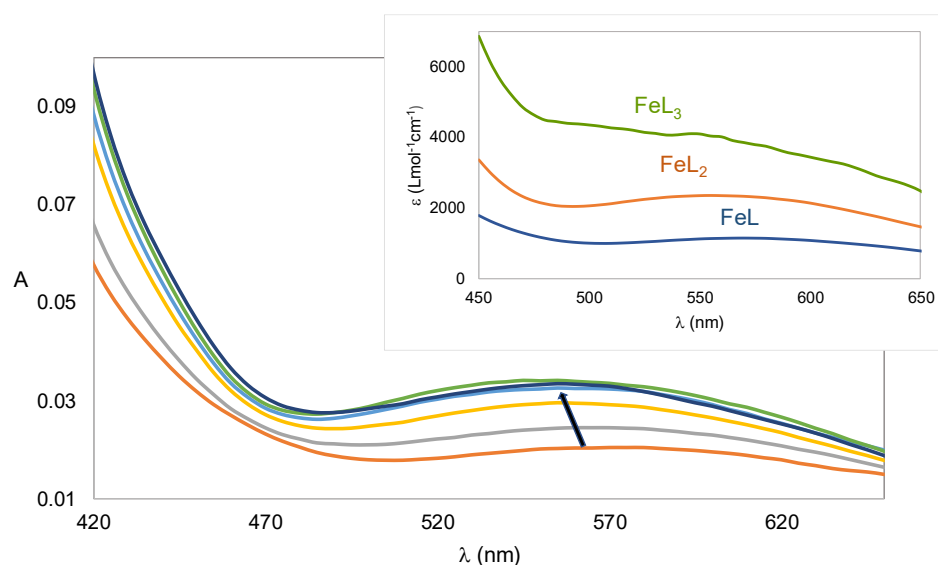

**Figure S1.** Absorption spectra for the Fe(III)/**5a** 1:3 system (  $2.71 < \text{pH} < 5.91$ ) in 50% (w/w) DMSO/H<sub>2</sub>O ( $C_L = 4 \times 10^{-5}$  M) and outset with individual calculated spectra by Psequad.

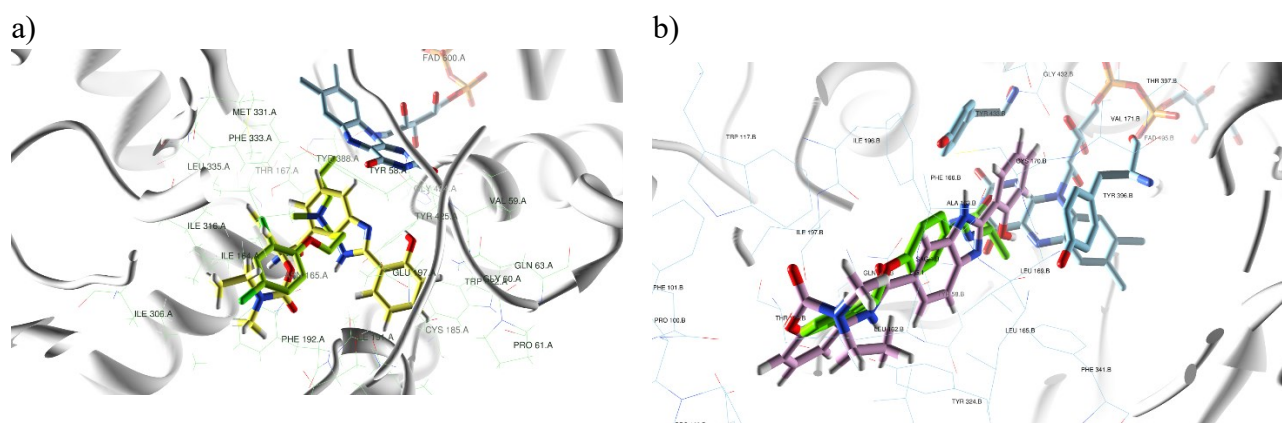

**Figure S2.** Docking results for RIV-BIM hybrids: (a) **5a** (yellow) with *h*-MAOA (PDB code: 2BXR) and (b) **4a** (pink) with *h*-MAOB (PDB code: 2V5Z). Pose comparisons with original ligand (green).
